# Supplementary material for: Cerato-Platanin Induces Resistance in Arabidopsis Leaves through Stomatal Perception, Overexpression of Salicylic Acid- and Ethylene-Signalling Genes and Camalexin Biosynthesis
Source: PLoS One. 2014 Jun 26;9(6):e100959. doi: 10.1371/journal.pone.0100959 (PMC4072723; doi:10.1371/journal.pone.0100959)
Supplement: Table S1 — Real-time RT-qPCR results. Pathogen library (6 h) and time-course analysis (1, 3, 6, 12, 24 h) for selected genes. (XLS) [file pone.0100959.s006.xls]

## Sheet: pathogen library, 6h
			Significantly up-regulated
			Significantly down-regulated
			ns = not significantly modulated
			sd = standard deviation
			Fold change values (2-ΔΔCt) are reported
			6 hours
Library ID	Locus	Description	H2O	sd	CP	sd	P≤0.05
E6	At4g16260	catalytic/ cation binding / hydrolase	1	0.16	98.2	25.09	*
H6	At3g25882	NIM1-interacting 2 protein (NIMIN-2)	1.62	1.8	34.61	4.89	*
F2/B10	At2g14560	LURP1 protein	2.86	3.8	31.37	1.32	*
A6/E7	At3g16530	legume lectin-like protein	1	0	28.51	2.14	*
F1	At1g02920	glutathione S-transferase 11 (GST11, GSTF7)	1.1	0.65	27.48	3.01	*
D3	At3g50770	putative calcium-binding protein CML41 (calmodulin-like 41)	1.05	0.45	25.67	8.8	*
G6	At4g39670	glycolipid transfer protein (T19P19.60)	1.6	1.76	25.52	4.52	*
A10	At2g44790	uclacyanin 2 (UCC2)	1	0.35	18.2	5	*
A8/F3	At4g04490	cysteine-rich receptor-like protein kinase 36 (CRK36)	1	0.41	16.29	4.25	*
D10	At2g47130	rossmann-fold NAD(P)-binding domain-containing protein	1.22	1	14.54	1.4	*
E9	At4g03450	ankyrin repeat-containing protein	1.13	0.74	14.18	3.72	*
G2	At2g32210	uncharacterized protein	1	0.09	10.28	0.92	*
F6	At5g20230	blue copper protein (BCB) (SAG14)	1	0.44	10.19	2.81	*
F7	At2g02930	glutathione S-transferase 16 (GSTF3)	1	0.25	9.68	0.62	*
A2	At3g56710	sigma factor binding protein 1 (SIB1)	1.1	0.6	9.18	1.2	*
A3	At4g02380	late embryogenesis abundant 5 (LEA5) or (SAG21)	1	0.11	8.64	0.79	*
C10	At1g21250	wall-associated receptor kinase 1 (WAK1)	1.17	0.86	8.18	0.4	*
C4	At1g47510	Type I inositol-1,4,5-trisphosphate 5-phosphatase 11 (5PTASE11)	1.2	0.94	7.45	0.92	*
E4	At4g11890	protein kinase family protein	1.29	1.15	7.44	3	*
C1	At3g56400	putative WRKY transcription factor 70	1.15	0.82	7.25	0.97	*
G11	At3g28210	zinc finger AN1 domain-containing stress-associated protein 12	1	0	7.12	0.46	*
C7	At2g32200	uncharacterized protein	1	0.47	6.8	0.9	*
C12	At4g17500	ethylene-responsive transcription factor 1A (ERF1A)	1	0.21	6.44	0.17	*
A4/B7	At5g60900	receptor-like protein kinase 1	1.35	1.28	6.19	0.55	*
G3	At4g11370	RING-H2 zinc finger protein RHA1a	1	0.08	6.03	2.92	*
D9	At1g73800	calmodulin binding protein-like	1.29	1.15	5.9	0.36	*
G10	At4g11280	1-aminocyclopropane-1-carboxylate synthase 6 (ACS6)	1	0.1	5.68	0.21	*
F8	At4g38540	FAD/NAD(P)-binding oxidoreductase family protein	1	0.35	5.42	0.54	*
B12	At4g14400	ankyrin repeat-containing protein (ACD6)	1.4	1.38	5.29	0.5	*
E8	At3g46090	C2H2 and C2HC zinc finger-containing protein (ZAT7)	1.52	1.61	5.19	1.5	*
B8	At4g23180	cysteine-rich receptor-like protein kinase 10 (CRK10)	1	0.14	4.88	1.9	*
A1	At2g32680	receptor like protein 23	1.21	0.96	4.58	1.94	*
B2	At5g18470	curculin-like (mannose-binding) lectin family protein	1	0.07	4.29	0.7	*
B1	At3g04720	hevein-like protein (PR-4)	1	0.17	4.24	0.95	*
D11	At4g37520	peroxidase 50	1	0	3.8	0.91	*
D6	At1g65970	peroxiredoxin-2C (TPX2) (thioredoxin-dependent peroxidase 2)	1.1	0.66	3.8	0.79	*
D2	At4g17490	ethylene-responsive transcription factor 6 (ERF6)	1.09	0.63	3.64	0.49	*
H1	At3g52430	protein PHYTOALEXIN DEFICIENT 4 (PAD4)	1.06	0.48	3.59	0.67	*
G7	At5g59820	C2H2-type zinc finger protein (RHL41, ZAT12)	1	0	3.55	0.22	*
C11	At5g26920	cam-binding protein 60-like G (CBP60g)	1.16	0.84	3.28	0.82	*
G1	At2g13790	somatic embryogenesis receptor kinase 4 (SERK4)	1.03	0.35	3.2	0.57	*
F10	At2g40140	zinc finger CCCH domain-containing protein 29	1	0.25	3.08	0.13	*
F11	At4g39890	ras-related protein RABH1C	1	0.27	2.8	0.55	*
B5	At3g59700	lectin-receptor kinase (HLECRK)	1	0.24	2.78	0.15	*
A12	At4g12720	nudix hydrolase 7 (NUDT7)	1	0.24	2.77	0.52	*
F12	At4g26070	mitogen-activated protein kinase kinase 1 (MEK1)	1	0.06	2.61	0.24	*
D1	At5g47200	RAB GTPase-1A (RAB1A)	1	0.1	2.5	0.19	*
C3	AT4g25390	protein kinase family protein	1.01	0.2	2.37	0.85	*
E5	At4g23130	cysteine-rich receptor-like protein kinase 5 (CRK5)	1	0.35	2.23	0.2	*
G5	At5g47910	respiratory burst oxidase-D (RBOHD)	1	0.11	2.18	0.11	*
C6	At3g04640	glycine-rich protein	1	0.14	2.15	0.17	*
F5	At2g40000	HS1 PRO-1 2-like protein (HSPRO2)	1	0.27	2.14	0.16	*
B9	At5g45110	NPR1-like protein 3 (NPR3)	1	0.14	2.11	0.4	*
A5	At1g18890	calcium-dependent protein kinase 1 (CDPK1)	1	0.11	1.98	0.27	*
G4	At4g34390	extra-large GTP-binding protein 2 (XLG2)	1.03	0.37	1.92	0.26	*
H2	At2g39400	alpha/beta-hydrolase domain-containing protein	1.01	0.15	1.26	0.04	*
B11	At4g36950	mitogen-activated protein kinase kinase kinase 21 (MAPKKK21)	1	0.25	35.15	31.91	ns
D5	At4g23150	cysteine-rich receptor-like protein kinase 7 (CRK7)	1.62	1.8	8.42	5.5	ns
A11	At1g10140	uncharacterized protein	1.05	0.47	1.91	0.37	ns
C5	At2g22270	uncharacterized protein	1	0.28	1.52	0.38	ns
C8	At1g05430	uncharacterized protein	1	0	1.34	0.6	ns
E12	At5g27600	long-chain acyl-CoA synthetase 7 (LACS7)	1	0.35	1.27	0.23	ns
B6	At4g16650	O-fucosyltransferase family protein	1	0.1	1.22	0.1	ns
F9	At2g45680	transcription factor TCP9	1	0.39	0.88	0.15	ns
G12	At4g37260	myb domain protein 73 (MYB73)	1	0.15	0.82	0.1	ns
A9	At4g11830	phospholipase D gamma 2 (PLDGAMMA2)	1	0.31	0.55	0.07	ns
G8	At2g35660	CTF2A like oxidoreductase	1	0.17	0.37	0.1	*
In bold: genes selected for the time-course analysis (following page)

## Sheet: time-course analysis
Significantly up-regulated
Significantly down-regulated
ns = not significantly modulated
sd = standard deviation
			1 hour						3 hours						6 hours						12 hours						24 hours
Library ID	Locus	Gene	H2O	sd	CP	sd	P≤0.05		H2O	sd	CP	sd	P≤0.05		H2O	sd	CP	sd	P≤0.05		H2O	sd	CP	sd	P≤0.05		H2O	sd	CP	sd	P≤0.05
	At4g01370	MPK4	1	0.11	0.76	0.19	ns		1.05	0.38	0.73	0.13	ns		1.01	0.2	1.54	0.21	*		1.01	0.19	1.4	0.15	*		1.04	0.41	1.31	0.87	ns
	At2g38470	WRKY33	1.02	0.22	2.78	0.71	*		1.1	0.3	2.03	0.51	*		1.09	0.55	4.06	0.83	*		1.03	0.37	1.63	0.38	ns		1.22	1	0.93	0.55	ns
C1	At3g56400	WRKY70	1.09	0.48	1.83	1.15	ns		1.11	0.53	1	0.42	ns		1.15	0.82	7.25	0.97	*		1.1	0.64	2.49	0.79	ns		1.08	0.58	2.29	2.16	ns
	At3g48090	EDS1	1.01	0.19	1.02	0.26	ns		1.07	0.43	1.35	0.54	ns		1	0.14	3.61	1.53	*		1.03	0.37	1.99	0.08	*		1.17	0.85	2.26	2.31	ns
H1	At3g52430	PAD4	1.06	0.41	1.22	0.5	ns		1.05	0.43	1.56	1.07	ns		1.06	0.48	3.59	0.67	*		1.01	0.16	2.38	0.85	*		1.55	1.67	1.67	1.6	ns
	At1g64280	NPR1	1	0.09	1.04	0.09	ns		1	0.12	0.94	0.51	ns		1	0.1	1.9	0.21	*		1.02	0.28	1.2	0.03	ns		1.55	1.67	1.01	0.56	ns
	At1g28480	GRX480	1.16	0.64	0.77	0.14	ns		1.08	0.45	3.39	2.8	ns		1.11	0.53	11.62	4.81	*		1	0.12	5.2	0.71	*		1.58	1.74	8.1	6.95	ns
C11	At5g26920	CBP60g	1.18	0.71	1.84	1.06	ns		1.25	0.78	1.81	1.17	ns		1.16	0.84	3.28	0.82	*		1	0.1	2.63	0.48	*		1.25	1.06	4.33	4.64	ns
	At1g32640	MYC2	1.01	0.2	0.64	0.08	*		1.06	0.46	1	0.66	ns		1.05	0.4	1.47	0.71	ns		1	0.1	1.05	0.04	ns		1	0.05	1.03	0.13	ns
	At2g39940	COI1	1.01	0.16	0.66	0.16	*		1.03	0.28	0.69	0.2	ns		1.01	0.16	1.04	0.26	ns		1.05	0.45	0.96	0.15	ns		1.01	0.18	0.94	0.36	ns
	At5g44420	PDF1.2a	1.52	1.14	1.21	1.52	ns		1.46	1.07	5.9	6.6	ns		1.6	1.3	1.82	1.95	ns		1.04	0.43	0.24	0.1	*		1.03	0.32	0.09	0.04	*
G10	At4g11280	ACS6	1.03	0.27	0.98	0.22	ns		1.11	0.63	1.71	1.6	ns		1	0.1	5.68	0.21	*		1.01	0.16	5.13	0.54	*		1.01	0.21	2.96	2.92	ns
C12	At4g17500	ERF1A	1	0.07	1.42	0.48	ns		1.17	0.83	7.7	6	ns		1	0.21	6.44	0.17	*		1	0.13	2.66	0.07	*		1	0.07	3.4	0.31	*
	At3g23240	ERF1b	1.06	0.44	0.98	0.72	ns		1.04	0.33	3	3.56	ns		1.1	0.53	4.33	1.91	*		1	0.09	3.6	0.29	*		1.43	1.44	1.53	0.86	ns
G5	At5g47910	RBOHD	1.01	0.13	1.34	0.33	ns		1.28	1.07	1.58	0.92	ns		1	0.11	2.18	0.11	*		1	0.1	0.98	0.13	ns		1	0.08	0.78	0.22	ns
	At2g14610	PR1	2.17	1.86	1.18	0.77	ns		1.13	0.58	0.24	0.25	ns		1.2	0.44	4.52	2.1	*		1.01	0.24	3.64	0.68	*		1.55	1.44	20.55	11.3	*
	At3g57260	PR2	1.85	1.48	0.73	0.57	ns		1.01	0.14	0.65	0.68	ns		1.1	0.4	2.7	0.9	*		1.26	1.08	1.37	0.79	ns		1.54	1.66	2.77	3.26	ns
	At3g12500	PR3	1.03	0.29	0.63	0.26	ns		1.04	0.36	0.6	0.51	ns		1.22	0.46	3.09	1.1	*		1.1	0.64	4.3	0.36	*		1.3	1.17	2.27	1.91	ns
B1	At3g04720	PR4	1.12	0.63	0.49	0.12	ns		1.25	1.07	1.87	2.42	ns		1	0.17	4.24	0.95	*		1.07	0.52	1.4	0.63	ns		1	0.09	1.06	0.04	ns
	At1g75040	PR5	1.83	1.52	0.69	0.54	ns		1.02	0.24	0.36	0.2	*		1.2	0.75	1.38	0.39	ns		1.05	0.47	1.31	0.45	ns		1.09	0.62	1.59	1.91	ns
